# Supplementary material
Source: MDPI journal article supplement (https://www.mdpi.com/2227-7102/11/10/638)
Supplement: s1 [file s1 › education-1378356-supplementary.pdf]

**CODING DOCUMENT S1: Characteristic of Studies Included in the Systematic Review****Executive coding-information:**

This coding book is for coding the characteristic of studies included in the systematic review, in the associated and attached form for table 1.

The abbreviations and the marks in the coding books (see the column Abbreviations and marks), are suggestions that may be used when the studies are to be coded in the table 1.

If the abbreviation is not specified in this coding book, you may write the whole word in the table 1 suggested in the column: Coding categories.

It may be beneficial to code the studies in table 1 by using this codebook 1 before you start to code the studies included in the meta-analysis by using codebook 2 and the associated form for table 2.

The coding is focusing mainly on group level information for treated group and control group separately.

If there is missing information in the studies, please leave the related cell or the part in the related cell blank.

If the coder must calculate the number of included participants, IQ and age in months, both the mean and the standard deviation (SD), use Excel.

For calculating the standard deviation (SD), use STDEV in Excel. For the calculation in Excel, use 3 decimal places.

For table 1, code the IQ (SD), and age (SD) with 2 decimal places.

| <b>Index</b>                  | <b>Coding categories</b> | <b>Operational definitions</b>                                                                                                                                | <b>Abbreviations and marks suggested for table 1</b> |
|-------------------------------|--------------------------|---------------------------------------------------------------------------------------------------------------------------------------------------------------|------------------------------------------------------|
|                               |                          | If the coder must calculate the number of the sample, IQ, age and/ or dosage delivered, mark with<br>For more explanation, see below.                         | <sup>c</sup>                                         |
| Authors,<br>year,<br>location |                          | Specify the authors. Place for publication (country). For example, Ahlgrim-Delzell et al., 2016, USA                                                          |                                                      |
|                               |                          | If the study uses a sub-selection with participants with identified disorders of intellectual development based on data from the authors, mark the study with | *                                                    |

Supplementary Files

|                                                                 |                           |                                                                                                                                                                                                                                                                                                                                                                                                                                                                                                                                                                                                                                                                                                                                                                                                     |       |
|-----------------------------------------------------------------|---------------------------|-----------------------------------------------------------------------------------------------------------------------------------------------------------------------------------------------------------------------------------------------------------------------------------------------------------------------------------------------------------------------------------------------------------------------------------------------------------------------------------------------------------------------------------------------------------------------------------------------------------------------------------------------------------------------------------------------------------------------------------------------------------------------------------------------------|-------|
|                                                                 |                           | For more explanation, see below.                                                                                                                                                                                                                                                                                                                                                                                                                                                                                                                                                                                                                                                                                                                                                                    |       |
| Design                                                          | Randomized Control Trial  | Study subjects are randomly assigned to one of two/ several groups that are differentiated by whether they receive the intervention or not. Researchers may use any of several possible acceptable methods to conduct random assignment.                                                                                                                                                                                                                                                                                                                                                                                                                                                                                                                                                            | RCT   |
|                                                                 | Quasi Experimental Design | A study is eligible to be coded as a QED if it compares outcomes for subjects in a treated group with outcomes for subjects in a control group, but does not rely on random assignment to determine membership in the groups.<br>For example, if the study report that assignment to group was random, except for a few cases dictated by the participants school environment the study should be coded as QED.                                                                                                                                                                                                                                                                                                                                                                                     | QED   |
| Sample size (n) for the treated group and for the control group | Treated group             | For example, intervention group, treatment group or experimental group<br>Studies with more than one treated group:<br>If the study compares two types of reading and writing interventions and a third group not receiving intervention: confirm that each intervention individually meets all the inclusion criteria, and determine whether the treated groups received equivalent or different intervention:<br><ul style="list-style-type: none"> <li>- Equivalent interventions: use the data from the two treated groups to form one treated group in comparison with the control group. For example, if the two treated group both receives phonic-based intervention.</li> <li>- Different interventions: use the data from the control group and compare to each treated group.</li> </ul> | TG    |
|                                                                 |                           | It two treated groups are collapsed, mark with                                                                                                                                                                                                                                                                                                                                                                                                                                                                                                                                                                                                                                                                                                                                                      | **    |
|                                                                 |                           | Number of participants in the treated group                                                                                                                                                                                                                                                                                                                                                                                                                                                                                                                                                                                                                                                                                                                                                         | TG: n |
|                                                                 | Control group             | For example, comparison group, peers, waiting control group, practice as usual group, business as usual group or alternative treatment which are not related to reading and writing skills.<br>Studies with more than one control groups:<br><ul style="list-style-type: none"> <li>- use the control group which meets all the inclusion criteria.</li> </ul>                                                                                                                                                                                                                                                                                                                                                                                                                                      | CG    |
|                                                                 |                           | It the study have more than one control group, mark with                                                                                                                                                                                                                                                                                                                                                                                                                                                                                                                                                                                                                                                                                                                                            | ***   |

Supplementary Files

|                                                                                              |                                           |                                                                                                                                                                                                                                                                                                                                                                                                                                                                                                                                                                                                      |                       |
|----------------------------------------------------------------------------------------------|-------------------------------------------|------------------------------------------------------------------------------------------------------------------------------------------------------------------------------------------------------------------------------------------------------------------------------------------------------------------------------------------------------------------------------------------------------------------------------------------------------------------------------------------------------------------------------------------------------------------------------------------------------|-----------------------|
|                                                                                              |                                           | Number of participants in the control group                                                                                                                                                                                                                                                                                                                                                                                                                                                                                                                                                          | CG: n                 |
| Target aspect for the control group                                                          | Practice as usual                         | No intervention/ treatment                                                                                                                                                                                                                                                                                                                                                                                                                                                                                                                                                                           | PAU                   |
|                                                                                              | Alternative intervention                  | Alternative non-reading and/ or non-writing instruction control                                                                                                                                                                                                                                                                                                                                                                                                                                                                                                                                      | AI                    |
|                                                                                              | Waiting list                              | One of the group of participants included in the study is assigned to a waiting list and receives intervention after the active treated group. In the active intervention period, the waiting list group receive practice as usual or alternative intervention.                                                                                                                                                                                                                                                                                                                                      | WL                    |
|                                                                                              |                                           | If the study uses for example practice as usual and waiting list, report both, but only the statistics from the control group period (PAU).                                                                                                                                                                                                                                                                                                                                                                                                                                                          |                       |
| Age (mean in months) and standard deviation (SD) for the treated group and the control group | TG: mean age in months standard deviation | If data is presented in years, calculate in months.                                                                                                                                                                                                                                                                                                                                                                                                                                                                                                                                                  | TG: age (SD)          |
|                                                                                              |                                           | If the SD is not reported, the SD must be calculated if relevant information for such calculation is available.                                                                                                                                                                                                                                                                                                                                                                                                                                                                                      |                       |
|                                                                                              | CG: mean age in months standard deviation | If data is presented in years, calculate in months.                                                                                                                                                                                                                                                                                                                                                                                                                                                                                                                                                  | TG: age (SD)          |
|                                                                                              |                                           | If the SD is not reported, the SD must be calculated if relevant information for such calculation is available.                                                                                                                                                                                                                                                                                                                                                                                                                                                                                      |                       |
| IQ test, IQ (mean) and standard deviation (SD) for the treated group and the control group   |                                           | <p>For both treated group and control group:</p> <p>If standardized IQ score is not reported in the article, but the raw scores from the IQ test are reported, use raw scores.</p> <p>If data from more than one subtest of IQ is available, collapse the raw scores from all IQ test into one overall IQ raw score, mark with</p> <p>If the IQ is not reported in the text, please check the figures or tables.</p> <p>Code the IQ test used with the abbreviation of the name of the test, for example WISC-III.</p> <p>If the name of the test is not reported, code it as unknown, mark with</p> | <p>****</p> <p>UK</p> |

Supplementary Files

|                                                                                               |                                      |                                                                                                                                                                                                                                                                           |                                     |
|-----------------------------------------------------------------------------------------------|--------------------------------------|---------------------------------------------------------------------------------------------------------------------------------------------------------------------------------------------------------------------------------------------------------------------------|-------------------------------------|
|                                                                                               |                                      | NOTE: If $IQ \geq 75$ a sub sample has to be selected because only participants with $IQ \leq 74$ should be included, please contact the first author of this review to receive the relevant data.                                                                        |                                     |
|                                                                                               |                                      | If the SD is not reported, the SD must be calculated for both groups separately if necessary information is available in the text or in the figures/ tables, for example, TG: 41.5 (12.6).                                                                                |                                     |
|                                                                                               | TG: mean IQ<br>standard<br>deviation |                                                                                                                                                                                                                                                                           |                                     |
|                                                                                               | CG: mean IQ<br>standard<br>deviation |                                                                                                                                                                                                                                                                           |                                     |
|                                                                                               |                                      | An example on coding IQ test, IQ (mean) and standard deviation (SD):<br>WISC-III<br>TG: 56.44 (5.72)<br>CG: 60.45 (7.80)                                                                                                                                                  |                                     |
| Description<br>of the<br>sample<br>including<br>both treated<br>group and<br>control<br>group |                                      | Code the participants etiology of disorders of intellectual development:                                                                                                                                                                                                  | DS<br>Multifactor<br>ial<br><br>AAC |
|                                                                                               |                                      | Down syndrome<br>Multifactorial etiology of disorders of intellectual development, for example the study includes participants with autism and disorders of intellectual development or multiple disabilities including disorders of intellectual development             |                                     |
|                                                                                               |                                      | Code the participants verbal skills:                                                                                                                                                                                                                                      |                                     |
|                                                                                               |                                      | Specify the participants verbal skills at entry time as reported in the study, for example:<br>Alternative augmentative communication<br>Verbal<br>Non-verbal<br>Varied<br>For example, if the study report that the participants are non-verbal and use AAC, code booth. |                                     |

Supplementary Files

|                                                                      |                           |                                                                                                                                                                                                                                                                                                                                                                                                                                  |    |
|----------------------------------------------------------------------|---------------------------|----------------------------------------------------------------------------------------------------------------------------------------------------------------------------------------------------------------------------------------------------------------------------------------------------------------------------------------------------------------------------------------------------------------------------------|----|
|                                                                      |                           | Code the participants decoding skills:                                                                                                                                                                                                                                                                                                                                                                                           |    |
|                                                                      |                           | Specify the participants decoding skills at entry time as reported in the study, for example:<br>No<br>Emergent<br>Varied                                                                                                                                                                                                                                                                                                        |    |
|                                                                      |                           | Code the participants adaptive functioning:                                                                                                                                                                                                                                                                                                                                                                                      |    |
|                                                                      |                           | Specify the participants adaptive functions at study entry as reported if the study, for example:<br>Behavior challenges                                                                                                                                                                                                                                                                                                         | BC |
| Intervention for students with disorders of intellectual development | Yes                       | The reading and/or writing intervention is previously specifically developed for students with disorders of intellectual development                                                                                                                                                                                                                                                                                             |    |
|                                                                      | No                        | The reading and/or writing intervention is previously developed for students without disorders of intellectual development (for example students who were struggling to learn to read and/ or write)                                                                                                                                                                                                                             |    |
|                                                                      | Partly                    | The reading and/or writing intervention have used an intervention initially developed for typically developing learners, and adapted for students with disorders of intellectual development. For example, the materials are adapted so that the words were easy to read with a special font in big size in black ink on white background for a clear contrast.                                                                  |    |
|                                                                      | Supplemental instructions | The intervention uses supplemental instructions related to adaptive functioning. For example, providing frequent reinforcement of student responses, carefully specified wait time between the presentation of stimuli and the prompt for student responses, repeated opportunities to practice each skill, visual schedule of the activities in the lesson, and/ or procedures according to some student's behavior challenges. | SI |
|                                                                      |                           | If the study uses for example a reading and/or writing intervention previously developed for students with disorders of intellectual development and supplemental instructions, report both:<br>Yes<br>SI.                                                                                                                                                                                                                       |    |

Supplementary Files

|                                                                         |                                |                                                                                                                                                                                                                                                                                                                                             |     |
|-------------------------------------------------------------------------|--------------------------------|---------------------------------------------------------------------------------------------------------------------------------------------------------------------------------------------------------------------------------------------------------------------------------------------------------------------------------------------|-----|
| Organiza-<br>tion                                                       | Individually                   | The provider performs the intervention only for one student at the time (One-to-one)                                                                                                                                                                                                                                                        |     |
|                                                                         | Group                          | Groups and number of participants, for example Groups 2-4                                                                                                                                                                                                                                                                                   |     |
|                                                                         |                                | If the study uses individually and group organization, report both.                                                                                                                                                                                                                                                                         |     |
| Reading<br>related<br>aspects<br>trained<br>for the<br>treated<br>group |                                | Code the emergent skills trained:                                                                                                                                                                                                                                                                                                           |     |
|                                                                         | Phonological<br>Awareness      | Identifying and manipulating units of oral or written words, syllables, and onsets and rimes, including phonemic awareness and phoneme Identification                                                                                                                                                                                       | PA  |
|                                                                         | Letter<br>Knowledge            | Instruction on letter naming and letter–sound correspondence with individual letters and letter combinations                                                                                                                                                                                                                                | LK  |
|                                                                         | Concepts of<br>Print           | Include the concept of text (how a text conveys a message), concept of book (how a book works, how different texts are organized), the idea of directionality (written text are read from left to right, top to bottom), and other mechanical features (spacing, punctuation, the difference between letters, numerals, and other symbols). | CP  |
|                                                                         |                                | Code the decoding skills trained:                                                                                                                                                                                                                                                                                                           |     |
|                                                                         | Sound<br>Blending              | Segments sounds in words and build words from individual sounds by blending the sounds together in sequence                                                                                                                                                                                                                                 | SB  |
|                                                                         | Phonic                         | Instruction on how to use grapheme-phoneme correspondences to decode or spell words                                                                                                                                                                                                                                                         | P   |
|                                                                         | Fluency                        | Repeated/paired/time reading of connected text                                                                                                                                                                                                                                                                                              | F   |
|                                                                         | Word<br>Recognition            | Instruction on recognizing high-frequency phonetically irregular words, decoding phonetically regular words, applying a flexible decoding strategy                                                                                                                                                                                          | WR  |
|                                                                         | Text Reading                   | Read connected text in a sentence or a story                                                                                                                                                                                                                                                                                                | TR  |
|                                                                         | Single Word<br>Reading         | Read single trained word                                                                                                                                                                                                                                                                                                                    | SWR |
|                                                                         | combined<br>with sight<br>word | Instruction with a sight word approach combined with decoding or encoding instructions and linguistic comprehension instruction.                                                                                                                                                                                                            |     |
|                                                                         |                                | Code the linguistic comprehension skills trained:                                                                                                                                                                                                                                                                                           |     |

Supplementary Files

|                                                                      |                      |                                                                                                                                                                                                                                                                                                                                                                                                                                                                                                                                                                                                                                                                                         |                           |
|----------------------------------------------------------------------|----------------------|-----------------------------------------------------------------------------------------------------------------------------------------------------------------------------------------------------------------------------------------------------------------------------------------------------------------------------------------------------------------------------------------------------------------------------------------------------------------------------------------------------------------------------------------------------------------------------------------------------------------------------------------------------------------------------------------|---------------------------|
|                                                                      |                      | Instruction on developing the participants understanding of vocabulary knowledge, a written passage and in written communication, for example<br>Comprehension questions<br>Comprehension strategies                                                                                                                                                                                                                                                                                                                                                                                                                                                                                    | CQ<br>CS                  |
|                                                                      |                      | Code other skills trained:                                                                                                                                                                                                                                                                                                                                                                                                                                                                                                                                                                                                                                                              |                           |
|                                                                      | Vocabulary           | Instruction on developing the participants expressive and receptive vocabulary                                                                                                                                                                                                                                                                                                                                                                                                                                                                                                                                                                                                          | V                         |
|                                                                      | Oral<br>Language     |                                                                                                                                                                                                                                                                                                                                                                                                                                                                                                                                                                                                                                                                                         | OL                        |
|                                                                      |                      | An example on Reading related aspects trained for the treated group:<br>Emergent skills: PA,LK.<br>Decoding: P,SB,TR combined with sight-word.<br>Linguistic comprehension: CQ.<br>Others: V.                                                                                                                                                                                                                                                                                                                                                                                                                                                                                           |                           |
| Writing<br>related<br>aspects<br>trained for<br>the treated<br>group |                      | Code the encoding skills trained:                                                                                                                                                                                                                                                                                                                                                                                                                                                                                                                                                                                                                                                       |                           |
|                                                                      | Phonetic<br>spelling | If reported in the study                                                                                                                                                                                                                                                                                                                                                                                                                                                                                                                                                                                                                                                                |                           |
|                                                                      | Letter<br>Formation  | Tracing and forming of letters and words, for example form dictated words with two syllables                                                                                                                                                                                                                                                                                                                                                                                                                                                                                                                                                                                            | LF                        |
| Teaching<br>materials                                                |                      | Describe any physical or informational materials used in the intervention, including those provided to participants or used in intervention delivery or in training of intervention providers. These may include: <ul style="list-style-type: none"> <li>- Digital items: Name on the app and the main features</li> <li>- The name of the method/programme that the material is taken from <i>in cursive, for example Jolly Phonics Reading Intervention</i></li> <li>- Instruction manual developed for the provider</li> <li>- Books adapted for the students reading and writing level</li> <li>- Cards with letter, words, pictures, symbols and other types of script.</li> </ul> | Manual<br>Graded<br>books |

Supplementary Files

|                  |                                             |                                                                                                                                                                                                                                                                                                                                                        |                                |
|------------------|---------------------------------------------|--------------------------------------------------------------------------------------------------------------------------------------------------------------------------------------------------------------------------------------------------------------------------------------------------------------------------------------------------------|--------------------------------|
| Dosage delivered |                                             | Delivered for the treated group: A) the number of sessions implemented, B) the length of each session, C) the frequency with which intervention were implemented in weeks. A, B and C summarized together, i.e., number of sessions x the length of each session= N in hours, present together with weeks in the table, for example 66.7 hours in 20W. |                                |
|                  |                                             | Weeks                                                                                                                                                                                                                                                                                                                                                  | W                              |
| Provider         | Teachers from the school staff              | The provider is the students' teacher at school                                                                                                                                                                                                                                                                                                        |                                |
|                  | Teachers from the research staff            | The teacher is employed fully or partly in the research team                                                                                                                                                                                                                                                                                           |                                |
|                  | Certified                                   | The teachers are certified in special education                                                                                                                                                                                                                                                                                                        | Certified in SE                |
|                  | Research assistants from the research staff | The provider is an assistant from the research staff/ team                                                                                                                                                                                                                                                                                             |                                |
|                  | Researcher                                  | The provider is one of the researchers                                                                                                                                                                                                                                                                                                                 |                                |
|                  | Interventionist                             | The provider is an interventionist from the research team                                                                                                                                                                                                                                                                                              |                                |
|                  | Parents                                     | The provider is a parent                                                                                                                                                                                                                                                                                                                               |                                |
|                  | Teaching psychologists                      | The provider is a teaching psychologist at Early Childhood Development Center                                                                                                                                                                                                                                                                          | Teaching psychologists at ECDC |
|                  | Teaching assistants from the                | The provider is the students' assistants at school                                                                                                                                                                                                                                                                                                     |                                |

Supplementary Files

|  |              |  |  |
|--|--------------|--|--|
|  | school staff |  |  |
|--|--------------|--|--|

**CODING DOCUMENT S2: Effects of Interventions on Dependent Variables on Reading and Writing****Executive coding-information:**

This coding book is for coding the effects of interventions on dependent variables on reading and writing, coded in the associated and attached form for table 2. The effect sizes coded in table 2 form the basis for the meta-analysis. The meta-analysis will be carried out by the reviewer/main author, not the coder.

It is the effect sizes executively on reading (i.e., decoding and linguistic comprehension) and writing (i.e., encoding and linguistic production) related to the included participants with an identified disorders of intellectual development reported in the studies which are coded in table 2.

The abbreviations and the marks in the coding books (see the column Abbreviations and marks), are suggestions that may be used when the included dependent variables on reading and writing are to be coded in the table 2.

If the abbreviation is not specified in this coding book, you may write the whole word in the table 2 suggested in the column: Coding categories.

It may be beneficial to have finishing the coding of the studies in table 1 by using the codebook 1 before you code the dependent variables on reading and writing including in the meta-analysis by using this codebook 2 and the table 2.

The coding is focusing mainly on group level information for treated group and control group separately.

If there is missing information in the studies, please leave the related cell or the part in the related cell blank.

| <b>Index</b> | <b>Coding categories</b> | <b>Operational definitions</b>                                                                                                                                      | <b>Abbreviations and marks suggested for table 2</b> |
|--------------|--------------------------|---------------------------------------------------------------------------------------------------------------------------------------------------------------------|------------------------------------------------------|
|              |                          | If the coder must calculate the effect sizes for the dependent variables in reading and writing in Cohen's <i>d</i> , mark with<br>For more explanation, see below. | <sup>c</sup>                                         |
| Authors      | Authors (year)           | Specify the author(s)                                                                                                                                               |                                                      |
|              |                          | If the study uses a sub-selection with participants with identified disorders of intellectual development based on data from the authors, mark with                 | *                                                    |

Supplementary Files

|                                                                          |                       |                                                                                                                                                                                                                                                                                                                                                                                                                                                                                                                                                                                                                                                                                                                                                                                                                                                                                                                                                                                                                                                                                                         |                            |
|--------------------------------------------------------------------------|-----------------------|---------------------------------------------------------------------------------------------------------------------------------------------------------------------------------------------------------------------------------------------------------------------------------------------------------------------------------------------------------------------------------------------------------------------------------------------------------------------------------------------------------------------------------------------------------------------------------------------------------------------------------------------------------------------------------------------------------------------------------------------------------------------------------------------------------------------------------------------------------------------------------------------------------------------------------------------------------------------------------------------------------------------------------------------------------------------------------------------------------|----------------------------|
| Statistical test used for analysis                                       |                       | Specify the statistical test used for analysis as presented in the study, for example:<br>Analysis of variance<br>Multivariate analysis of covariance<br>Analysis of covariance                                                                                                                                                                                                                                                                                                                                                                                                                                                                                                                                                                                                                                                                                                                                                                                                                                                                                                                         | ANOVA<br>MANCOVA<br>ANCOVA |
| Measurements for the dependent variables in reading and writing          | Standardized test     | Categorize the tests as standardized test and the abbreviations of the name on the tests for example, ST/PPVT-III. Specify the dependent variables measured, this must be in the same line as the associated effect size reported in the next columns in table 2.                                                                                                                                                                                                                                                                                                                                                                                                                                                                                                                                                                                                                                                                                                                                                                                                                                       | ST                         |
|                                                                          | Non-standardized test | Categorize the tests as non-standardized test, name on the tests and/ or a brief description and the eventually abbreviations, for example NST/Non-word reading. Specify the dependent variables measured, this must be in the same line as the related effect size coded in the next columns in table 2.                                                                                                                                                                                                                                                                                                                                                                                                                                                                                                                                                                                                                                                                                                                                                                                               | NST                        |
| Coding of the effect sizes on dependent variables on reading and writing |                       | <p>The effect size coded are Cohen's <math>d</math> as a measure of the magnitude of the difference between treated group and the control group for each study which reported effect sizes on the dependent variables in reading and writing.</p> <p>If the study does not report effect sizes on the dependent variables in reading and writing, the coder must calculate the effect sizes of the interventions on reading and writing in Cohen's <math>d</math> by using sample size, means and pooled standard deviations (SD) for pre- and post-test scores.</p> <p>If other scale is used, convert the effects of intervention to Cohen's <math>d</math>. For example, if the study reports the effect size in F statistic, the F statistic must be converted to Cohen's <math>d</math>. Calculate the Cohen's <math>d</math> by using the software Comprehensive Meta-Analysis Version 3 (CMA-V3) (the standardized difference in means = Cohen's <math>d</math>).</p> <p>For the calculation in CMA-V3, use 3 decimal places. For table 2, the effect sizes are coded with 2 decimal places.</p> |                            |
| Effect size on trained reading                                           |                       | <p>Code the effect size in Cohen's <math>d</math> for each study if reported effect sizes on trained reading. i.e., the students read the words they have been introduced for in the intervention, measured at the posttest with mainly non-standardized tests.</p> <p>Note: report or conduct calculation on the correct sub sample with an identified disorders of intellectual development.</p>                                                                                                                                                                                                                                                                                                                                                                                                                                                                                                                                                                                                                                                                                                      |                            |

Supplementary Files

|                                                         |  |                                                                                                                                                                                                                                                                                                                                                                                                                                   |  |
|---------------------------------------------------------|--|-----------------------------------------------------------------------------------------------------------------------------------------------------------------------------------------------------------------------------------------------------------------------------------------------------------------------------------------------------------------------------------------------------------------------------------|--|
| Collapsed trained reading effect for meta-analysis (M)  |  | If a study report more than one effect size on trained reading, code in addition the trained reading effect by collapsing these effect sizes within the study for a mean Cohen's <i>d</i> .                                                                                                                                                                                                                                       |  |
| Effect size on transfer reading                         |  | Code the effect size in Cohen's <i>d</i> for each study if reported effect sizes on transfer reading, i.e., the students read unfamiliar words which have similar phonetic structure to the trained words, or unknown words for the students, measured at the posttest with mainly standardized tests.<br>Note: report or conduct calculation on the correct sub sample with an identified disorders of intellectual development. |  |
| Collapsed transfer reading effect for meta-analysis (M) |  | If a study report more than one effect size on transfer reading, code in addition the transfer reading effect by collapsing these effect sizes within the study for a mean Cohen's <i>d</i> .                                                                                                                                                                                                                                     |  |
| Effect size on trained writing                          |  | Code the effect size in Cohen's <i>d</i> for each study if reported effect sizes on trained writing. i.e., the students write the words they have been introduced for in the intervention, measured at the posttest with mainly non-standardized tests.<br>Note: report or conduct calculation on the correct sub sample with an identified disorders of intellectual development.                                                |  |
| Collapsed trained writing effect for                    |  | If a study report more than one effect size on trained writing, code in addition the trained writing effect by collapsing these effect sizes within the study for a mean Cohen's <i>d</i> .                                                                                                                                                                                                                                       |  |

# Supplementary Files

|                                                         |  |                                                                                                                                                                                                                                                                                                                                                                                                                                                                                                                                                        |  |
|---------------------------------------------------------|--|--------------------------------------------------------------------------------------------------------------------------------------------------------------------------------------------------------------------------------------------------------------------------------------------------------------------------------------------------------------------------------------------------------------------------------------------------------------------------------------------------------------------------------------------------------|--|
| meta-analysis (M)                                       |  |                                                                                                                                                                                                                                                                                                                                                                                                                                                                                                                                                        |  |
| Effect size on transfer writing                         |  | <p>Code the effect size in Cohen's <math>d</math> for each study if reported effect sizes on transfer writing, i.e., the students write unfamiliar words which have similar phonetic structure to the trained words, or unknown words for the students, measured at the posttest with mainly standardized tests.</p> <p>Note: report or conduct calculation on the correct sub sample with an identified disorders of intellectual development.</p>                                                                                                    |  |
| Collapsed transfer writing effect for meta-analysis (M) |  | <p>If a study report more than one effect size on transfer writing, code in addition the transfer writing effect by collapsing these effect sizes within the study for a mean Cohen's <math>d</math>.</p>                                                                                                                                                                                                                                                                                                                                              |  |
| Follow up/ long-term effect sizes                       |  | <p>Code the effect size in Cohen's <math>d</math> for each study if reported long-term effect sizes, i.e., the reading and writing effect sizes for the treated group and the control group are compared by a maintain test some months later after the end of intervention. There must be controls for the long-term effect sizes to be included in the meta-analysis for long term effect on reading and writing.</p> <p>Note: report or conduct calculation on the correct sub sample with an identified disorders of intellectual development.</p> |  |

**SEARCH STRATEGY S1: Search terms and the search in MEDLINE**

Search terms:

A. Disorder of intellectual development: cognitive\*; development\*; disabilit\*; impair\*; intellectual\*; learning\*; mental\* handicap\*; subnormal\*.

B. Reading and writing: alphabet\*; blending; decoding; dictation; dissemination; emergent literacy; encoding; formation; free writing; handwriting; literacy; letter typing; logograph\*; message sentence\*; morphology; non-word reading; orthograph\*; orthography; phonem\*; phonics; phonolog\*; prewriting; reading; reading comprehension; reading fluency; shared reading; sight word\*; spelling; summary; syllables; word identification; word recognition; writing; writing comprehension; writing fluency; writing process.

C. Participants: adolescen\*; child\*; pupil\*; student\*.

|    | <b>MEDLINE</b>                                                                                                                                                                                                                |         |          |
|----|-------------------------------------------------------------------------------------------------------------------------------------------------------------------------------------------------------------------------------|---------|----------|
| 58 | limit 57 to (("all child (0 to 18 years)" or "preschool child (2 to 5 years)" or "child (6 to 12 years)" or "adolescent (13 to 18 years)") and (danish or english or norwegian or swedish))                                   | 863     | Advanced |
| 57 | 51 and 56                                                                                                                                                                                                                     | 998     | Advanced |
| 56 | 52 or 53 or 54 or 55                                                                                                                                                                                                          | 3359256 | Advanced |
| 55 | student*.mp.                                                                                                                                                                                                                  | 261645  | Advanced |
| 54 | pupil*.mp.                                                                                                                                                                                                                    | 29488   | Advanced |
| 53 | adolescen*.mp.                                                                                                                                                                                                                | 1899063 | Advanced |
| 52 | child*.mp.                                                                                                                                                                                                                    | 2187836 | Advanced |
| 51 | 49 and 50                                                                                                                                                                                                                     | 1090    | Advanced |
| 50 | 40 or 41 or 42 or 43 or 44 or 45 or 46 or 47 or 48                                                                                                                                                                            | 96225   | Advanced |
| 49 | 1 or 2 or 3 or 4 or 5 or 6 or 7 or 8 or 9 or 10 or 11 or 12 or 13 or 14 or 15 or 16 or 17 or 18 or 19 or 20 or 21 or 22 or 23 or 24 or 25 or 26 or 27 or 28 or 29 or 30 or 31 or 32 or 33 or 34 or 35 or 36 or 37 or 38 or 39 | 42937   | Advanced |

# Supplementary Files

|    |                                         |       |          |
|----|-----------------------------------------|-------|----------|
| 48 | Mental subnormality.mp.                 | 258   | Advanced |
| 47 | Mental* handicap*.mp.                   | 2778  | Advanced |
| 46 | Intellectual* impair*.mp.               | 1373  | Advanced |
| 45 | Development disabilit*.mp.              | 20509 | Advanced |
| 44 | Cognitive disabilit*.mp.                | 924   | Advanced |
| 43 | learning disabilit*.mp.                 | 7228  | Advanced |
| 42 | mental* retard*.mp.                     | 34474 | Advanced |
| 41 | Intellectual Disability/                | 51512 | Advanced |
| 40 | "Education of Intellectually Disabled"/ | 5630  | Advanced |
| 39 | Writing fluency.mp.                     | 29    | Advanced |
| 38 | Writing comprehension.mp.               | 5     | Advanced |
| 37 | Word recognition.mp.                    | 4015  | Advanced |
| 36 | Word identification.mp.                 | 671   | Advanced |
| 35 | Summary writing.mp.                     | 4     | Advanced |
| 34 | spelling.mp.                            | 3133  | Advanced |
| 33 | Sight-word strateg*.mp.                 | 1     | Advanced |
| 32 | Sight-word reading.mp.                  | 27    | Advanced |
| 31 | shared reading.mp.                      | 68    | Advanced |
| 30 | Sentence construction.mp.               | 51    | Advanced |
| 29 | Sentence combining.mp.                  | 6     | Advanced |
| 28 | Reading fluency.mp.                     | 366   | Advanced |
| 27 | Reading comprehension.mp.               | 1598  | Advanced |
| 26 | Process writing.mp.                     | 10    | Advanced |
| 25 | Prewriting.mp.                          | 10    | Advanced |
| 24 | phonemic strateg*.mp.                   | 0     | Advanced |
| 23 | Orthographic strateg*.mp.               | 7     | Advanced |
| 22 | Logographic strateg*.mp.                | 1     | Advanced |
| 21 | phonologic* strateg*.mp.                | 31    | Advanced |
| 20 | Phonological reading.mp.                | 47    | Advanced |
| 19 | phonological awareness.mp.              | 1078  | Advanced |
| 18 | Phonics.mp.                             | 121   | Advanced |
| 17 | Phonemic reading.mp.                    | 1     | Advanced |
| 16 | Phonemic awareness.mp.                  | 191   | Advanced |
| 15 | Orthographic writing.mp.                | 3     | Advanced |
| 14 | Orthographic reading.mp.                | 8     | Advanced |

## Supplementary Files

|    |                           |       |          |
|----|---------------------------|-------|----------|
| 13 | non-word reading.mp.      | 96    | Advanced |
| 12 | Message dissemination.mp. | 22    | Advanced |
| 11 | logographic writing.mp.   | 9     | Advanced |
| 10 | logographic reading.mp.   | 10    | Advanced |
| 9  | Letter formation.mp.      | 25    | Advanced |
| 8  | Free writing.mp.          | 29    | Advanced |
| 7  | Emergent literacy.mp.     | 145   | Advanced |
| 6  | early literacy.mp.        | 226   | Advanced |
| 5  | Alphabetic.mp.            | 644   | Advanced |
| 4  | READING/                  | 20396 | Advanced |
| 3  | WRITING/                  | 14208 | Advanced |
| 2  | LITERACY/                 | 326   | Advanced |
| 1  | HANDWRITING/              | 2728  | Advanced |

## SEARCH STRATEGY S2: Overview of studies that were impossible to recover

- One study [1] was impossible to procure, even with the help of the University and National libraries.
- For one study, both authors were contacted via their universities, and the study was requested by the University Library, but was impossible to recover [2].
- Two papers failed to provide adequate details of instructions and measures; a request and reminder were sent to the authors, but there was no response, and these papers were excluded [3,4].

- [1] Eni-Olorunda, T. Efficacy of modelling and shaping strategies on attitude of children with mild mental retardation towards reading in Ibadan, Nigeria. *European Journal of Social Sciences*. **2010**, 16(4), 645-654.
- [2] Kalgotra, R., & Warwal, J. S. (2018). Effect of literacy-rich-approach in teaching reading and writing skills using teaching strategies adopted from applied behaviour analysis on children with mild and moderate intellectual disabilities in India. *International Journal on Disability and Human Development*. **2018**, 17(4), 475-486.
- [3] Margelisch, K., & Perrig, W. J. *Impacts of a word-picture training on reading in youth with mixed intellectual disabilities. A waiting-list control group comparison*. Posterpresentation, **2015**, <http://boris.unibe.ch/63563/>
- [4] Margelisch, K., Törmänen, M., Studer, B., Eckstein, D., & Perrig, W. (2014). *Impacts of a word-picture training on literacy skills in elementary school children and youths with intellectual disabilities* . Posterpresentation, **2015**, <https://core.ac.uk/download/pdf/33078052.pdf>

**EXCLUDED STUDIES S1: An overview of a selection of candidate studies that were excluded**

**Not identified Disorders of Intellectual Development:**

- [1]
- [2]
- [3]
- [4]
- [5]
- [6]
- [7]
- [8]
- [9]
- [10]
- [11]
- [12]
- [13]

**Not RCT or QED:**

- [14]
- [15]
- [16]
- [17]
- [18]
- [19]
- [20]
- [21]
- [22]
- [23]
- [24]
- [25]

**Not in age 4-19:**

- [26]
- [27]
- [28]
- [29]

**No elements of required reading and/or writing instructions:**

- [30]
- [31]

## Supplementary Files

### **Not reporting or relevant post-test measures:**

- [32]
- [33]
- [34]
- [35]
- [36]

### **Active control-group:**

- [37]
- [38]
- [39]
- [40]

### **Lack of independence:**

- [41]
- [42]
- [43]
- [44]
- [45]

## References

1. Adediran, O.A.; Tolulope, E.-O.J. Gender difference in treatment intervention of reading comprehension achievement of pupils with intellectual disability. *Gender & Behaviour* **2013**, *11*, 5812-5818.
2. Ahlgrim-Delzell, L.; Browder, D.; Wood, L. Effects of Systematic Instruction and an Augmentative Communication Device on Phonics Skills Acquisition for Students with Moderate Intellectual Disability Who Are Nonverbal. *Education and Training in Autism and Developmental Disabilities* **2014**, *49*, 517-532.
3. Boyle, E.A.; Rosenberg, M.S.; Connelly, V.J.; Washburn, S.G.; Brinckerhoff, L.C.; Banerjee, M. Effects of Audio Texts on the Acquisition of Secondary-Level Content by Students with Mild Disabilities. *Learning Disability Quarterly* **2003**, *26*, 203-214, doi:10.2307/1593652.
4. Coyne, P.; Pisha, B.; Dalton, B.; Zeph, L.A.; Smith, N.C. Literacy by design: A universal design for learning approach for students with significant intellectual disabilities. *Remedial and Special Education* **2012**, *33*, 162-172, doi:10.1177/0741932510381651.
5. Eissa, M.A. The Effectiveness of a Phonological Awareness Training Intervention on Pre-Reading Skills of Children with Mental Retardation. *Online Submission* **2013**.
6. Englert, C.S.; et al. Making Strategies and Self-Talk Visible: Writing Instruction in Regular and Special Education Classrooms. *American Educational Research Journal* **1991**, *28*, 337-372, doi:10.3102/00028312028002337.
7. Hetzroni, O.E.; Shavit, P. Comparison of two instructional strategies for acquiring form and sound of hebrew letters by students with mild mental retardation. *Education and Training in Mental Retardation and Developmental Disabilities* **2002**, *37*, 273-282.
8. Isikdogan, N.; Kargin, T. Investigation of the Effectiveness of the Story-Map Method on Reading Comprehension Skills among Students with Mental Retardation. *Kuram Ve Uygulamada Egitim Bilimleri* **2010**, *10*, 1509-1527.
9. Pufpaff, L.A. Barriers to participation in kindergarten literacy instruction for a student with augmentative and alternative communication needs. *Psychology in the Schools* **2008**, *45*, 582-599, doi:10.1002/pits.20311.
10. Reed, D.K.; Lynn, D. The effects of an inference-making strategy taught with and without goal setting. *Learning Disability Quarterly* **2016**, *39*, 133-145, doi: <https://doi.org/10.1177/0731948715615557>
11. Saint-Laurent, L.; Giasson, J.; Couture, C. Emergent literacy and intellectual disabilities. *Journal of Early Intervention* **1998**, *21*, 267-281, doi:10.1177/105381519802100307.
12. Streitwieser, G.G. The effects of language training on reading fluency, written expression and listening ability of educable mentally handicapped adolescents. Doctoral dissertation, University of Nebraska, 1982.
13. Van Der Bijl, C.; Alant, E.; Lloyd, L. A comparison of two strategies of sight word instruction in children with mental disability. *Research in Developmental Disabilities* **2006**, *27*, 43-55, doi:<https://doi.org/10.1016/j.ridd.2004.12.001>
14. Baylis, P.; Snowling, M.J. Evaluation of a phonological reading programme for children with down syndrome. *Child Language Teaching and Therapy* **2012**, *28*, 39-56, doi:10.1177/0265659011414277.
15. Beecher, L.; Childre, A. Increasing Literacy Skills for Students with Intellectual and Developmental Disabilities: Effects of Integrating Comprehensive Reading Instruction with Sign Language. *Education and Training in Autism and Developmental Disabilities* **2012**, *47*, 487-501.

## Supplementary Files

16. Bradford, S.; Shippen, M.E.; Alberto, P.; Houchins, D.E.; Flores, M. Using systematic instruction to teach decoding skills to middle school students with moderate intellectual disabilities. *Education and Training in Developmental Disabilities* **2006**, *41*, 333-343.
17. Burgoyne, K.; Duff, F.; Snowling, M.; Buckley, S.; Hulme, C. Training Phoneme Blending Skills in Children with Down Syndrome. *Child Language Teaching and Therapy* **2013**, *29*, 273-290, doi:10.1177/0265659012474674.
18. Cartwright, G.P. Written language abilities of educable mentally retarded and normal children. *American Journal of Mental Deficiency* **1968**, *72*, 499-505.
19. Pennington, R.; Delano, M.; Scott, R. Improving cover-letter writing skills of individuals with intellectual disabilities. *Journal of Applied Behavior Analysis* **2014**, *47*, 204-208, doi:10.1002/jaba.96.
20. Hatcher, P.J. Sound links in reading and spelling with discrepancy-defined dyslexics and children with moderate learning difficulties. *Reading and Writing* **2000**, *13*, 257-272, doi:10.1023/a:1026486500271.
21. Kay-Raining Bird, E.; Cleave, P.L.; White, D.; Pike, H.; Helmkey, A. Written and oral narratives of children and adolescents with down syndrome. *Journal of Speech, Language, and Hearing Research* **2008**, *51*, 436-450, doi: [https://doi.org/10.1044/1092-4388\(2008/032\)](https://doi.org/10.1044/1092-4388(2008/032))
22. Konrad, M.; Clark, K.A.; Test, D.W. Effects of GO 4 IT . . . NOW! Strategy Instruction on Expository Writing Skills for Students With Disabilities. *Career Development and Transition for Exceptional Individuals* **2017**, *40*, 45-55, doi:10.1177/2165143416680884.
23. Lim, L.; Arciuli, J.; Munro, N.; Cupples, L. Using the MULTILIT literacy instruction program with children who have Down syndrome. *Reading and Writing* **2019**, *32*, 2179-2200, doi:10.1007/s11145-019-09945-8.
24. Lundberg, I.; Reichenberg, M. Developing Reading Comprehension Among Students With Mild Intellectual Disabilities: An Intervention Study. *Scandinavian Journal of Educational Research* **2013**, *57*, 89-100, doi:10.1080/00313831.2011.623179.
25. Sermier Dessemontet, R.; de Chambrier, A.-F. The role of phonological awareness and letter-sound knowledge in the reading development of children with intellectual disabilities. *Research in Developmental Disabilities* **2015**, *41-42*, 1-12, doi:<https://doi.org/10.1016/j.ridd.2015.04.001>.
26. Davies, D.K.; Stock, S.E.; King, L.R.; Wehmeyer, M.L. "Moby-dick is my favorite:" evaluating a cognitively accessible portable reading system for audiobooks for individuals with intellectual disability. *Intellectual And Developmental Disabilities* **2008**, *46*, 290-298.
27. Fajardo, I.; Tavares, G.; Avila, V.; Ferrer, A. Towards text simplification for poor readers with intellectual disability: When do connectives enhance text cohesion? *Research in Developmental Disabilities* **2013**, *34*, 1267-1279, doi:10.1016/j.ridd.2013.01.006.
28. Hua, Y.; Woods-Groves, S.; Ford, J.W.; Nobles, K.A. Effects of the paraphrasing strategy on expository reading comprehension of young adults with intellectual disability. *Education and Training in Autism and Developmental Disabilities* **2014**, *49*, 429-439.
29. Larson, J.R.; Juszczak, A.; Engel, K. Efficient Vocational Skills Training for People with Cognitive Disabilities: An Exploratory Study Comparing Computer-Assisted Instruction to One-on-One Tutoring. *Journal of Applied Research in Intellectual Disabilities* **2016**, *29*, 185-196, doi:10.1111/jar.12176.
30. Hales, V.E. Suggestopedia: Its effects on word identification skills of mildly and moderately retarded children. Doctoral dissertation, Texas Tech, 1983.
31. Mengoni, S.E.; Nash, H.; Hulme, C. The benefit of orthographic support for oral vocabulary learning in children with Down syndrome. *Journal of Child Language* **2013**, *40*, 221-243, doi:<https://doi.org/10.1017/s0305000912000396>

## Supplementary Files

32. Brug, A.; Van der Putten, A.A.J.; Penne, A.; Maes, B.; Vlaskamp, C. Making a difference? A comparison between multi-sensory and regular storytelling for persons with profound intellectual and multiple disabilities. *Journal of Intellectual Disability Research* **2016**, *60*, 1043-1053, doi:10.1111/jir.12260.
33. Haviland, J.E. Sentence combining: Improving the composition of mentally retarded students without formal grammar study. Doctoral dissertation, Temple University, 1982.
34. Pallikudiyl, M.V.; Ponath, S.S. Effect of literacy-rich-approach in the generalization and maintenance of reading comprehension skills in children with intellectual disability. *International Journal of Research in Engineering, Science and Management* **2020**, *3*, 2581---5792.
35. Gombert, J.-E. Children with Down syndrome use phonological knowledge in reading. *Reading and Writing* **2002**, *15*, 455-469.
36. Zaine, I.; Domeniconi, C.; de Rose, J.C. Simple and conditional discrimination and specific reinforcement in teaching reading: An intervention package. *Analysis of Verbal Behavior* **2014**, *30*, 193-204, doi:<https://doi.org/10.1007/s40616-014-0010-2>
37. Cleave, P.L.; Kay-Raining Bird, E.; Bourassa, D.C. Developing phonological awareness skills in children with down syndrome. *Canadian Journal of Speech-Language Pathology and Audiology* **2011**, *35*, 332-243.
38. Felix, V.G.; Mena, L.J.; Ostos, R.; Maestre, G.E. A Pilot Study of the use of Emerging Computer Technologies to Improve the Effectiveness of Reading and Writing Therapies in Children with Down Syndrome. *British Journal of Educational Technology* **2017**, *48*, 611-624, doi:10.1111/bjet.12426.
39. Kuntz, J.B.; Carrier, J.K.; Hollis, J.H. A nonvocal system for teaching retarded children to read and write. *Monograph of the American Association of Mental Deficiency* **1978**, 145-191.
40. Sermier Dessemontet, R.; de Chambrier, A.-F.; Martinet, C.; Meuli, N.; Linder, A.-L. Effects of a phonics-based intervention on the reading skills of students with intellectual disability. *Research in Developmental Disabilities* **2021**, *111*, 103883-103883, doi:10.1016/j.ridd.2021.103883.
41. Allor, J.H.; Mathes, P.G.; Roberts, J.K.; Jones, F.G.; Champlin, T.M. Teaching Students with Moderate Intellectual Disabilities to Read: An Experimental Examination of a Comprehensive Reading Intervention. *Education and Training in Autism and Developmental Disabilities* **2010**, *45*, 3-22.
42. Allor, J.H.; Mathes, P.G.; Roberts, J.K.; Cheatham, J.P.; Otaiba, S.A. Is Scientifically Based Reading Instruction Effective for Students With Below-Average IQs? *Exceptional Children* **2014**, *80*, 287-306, doi:10.1177/0014402914522208.
43. Browder, D.M.; Ahlgrim-Delzell, L.; Courtade, G.; Gibbs, S.L.; Flowers, C. Evaluation of the Effectiveness of an Early Literacy Program for Students with Significant Developmental Disabilities. *Exceptional Children* **2008**, *75*, 33-52, doi:10.1177/001440290807500102.
44. Burgoyne, K.; Duff, F.; Clarke, P.; Buckley, S.; Snowling, M.; Hulme, C. Reading and language intervention for children with Down syndrome: Outcomes from a RCT. *J. Intell. Disabil. Res.* **2012**, *56*, 696-696.
45. Finnegan, E.G. Two Approaches to Phonics Instruction: Comparison of Effects with Children with Significant Cognitive Disability. *Education and Training in Autism and Developmental Disabilities* **2012**, *47*, 269-279.
